# Supplementary material for: The Divergence of Flowering Time Modulated by FT/TFL1 Is Independent to Their Interaction and Binding Activities
Source: PubMed Central journal article supplement (PMC5421193; doi:10.3389/fpls.2017.00697), 2017-05-08
Supplement: Image_4.pdf [file Image_4.pdf]

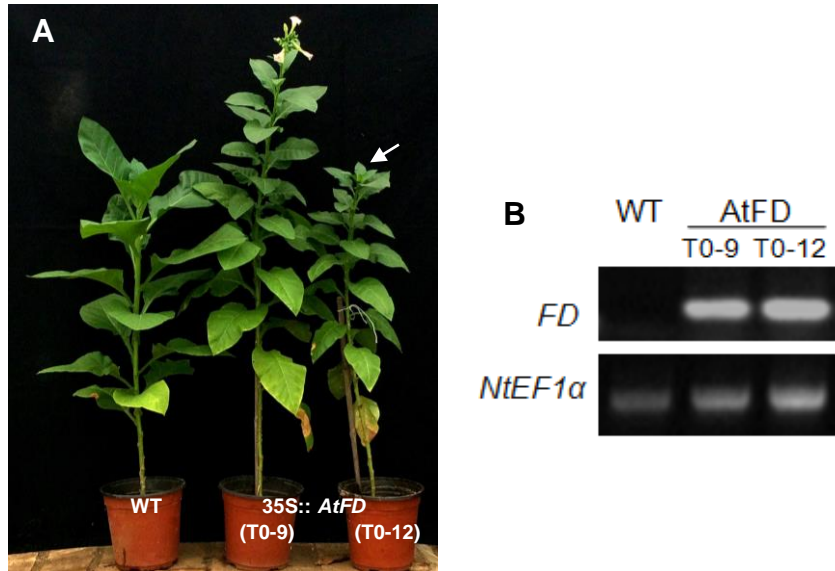

#### Supplementary Figure S4

Phenotype of transgenic tobacco plants harboring *Arabidopsis* FD (*AtFD*). (a) Transgenic tobacco lines containing *AtFD* after growth for 3 months in soil. (b) RT-PCR analysis to confirm the transgenic tobacco lines.
